# Supplementary material
Source: Springer Nature journal article supplement (https://www.springermedizin.de/resource/supplementary/12957_2013_1393_MOESM12_ESM.pdf/9562502)
Supplement: MOESM12 [file 9562502]

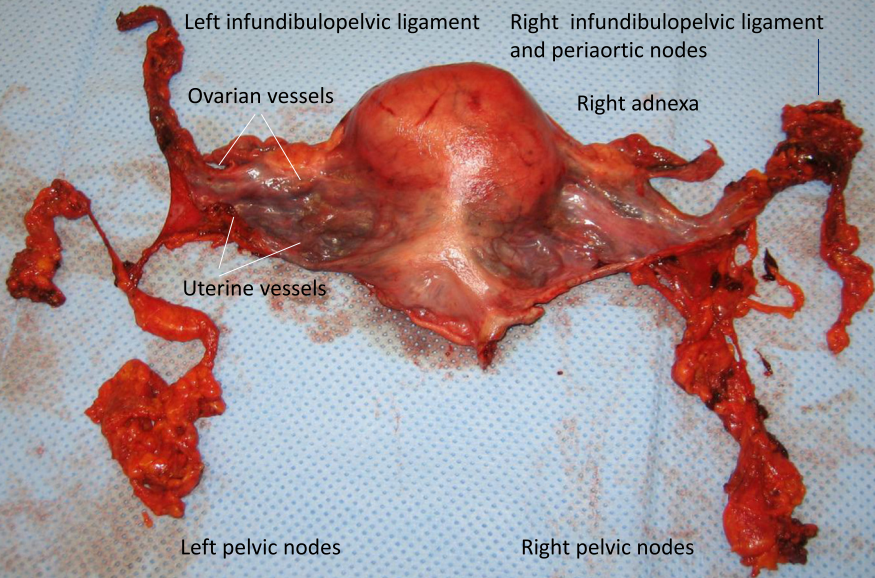

Left infundibulopelvic ligament

Right infundibulopelvic ligament  
and periaortic nodes

Ovarian vessels

Right adnexa

Uterine vessels

Left pelvic nodes

Right pelvic nodes
